# Supplementary material for: The antimicrobial capacity of Cistus salviifolius and Punica granatum plant extracts against clinical pathogens is related to their polyphenolic composition
Source: PubMed Central journal article supplement (PMC7803989; doi:10.1038/s41598-020-80003-y), 2021-01-12
Supplement: 41598_2020_80003_MOESM1_ESM.pdf [file 41598_2020_80003_MOESM1_ESM.pdf]

# The antimicrobial capacity of polyphenolic extracts against resistant clinical pathogens is related to their flavonoid and ellagitannin composition.

Francisco Javier Álvarez-Martínez <sup>1</sup>, Juan Carlos Rodríguez <sup>2</sup>, Fernando Borrás-Rocher <sup>3</sup>, Enrique Barrajon-Catalán <sup>1,\*,#</sup> and Vicente Micol <sup>1,4,#</sup>

<sup>1</sup> Instituto de Biología Molecular y Celular (IBMC) and Instituto de Investigación, Desarrollo e Innovación en Biotecnología Sanitaria de Elche (IDiBE), Universidad Miguel Hernández; 03202, Elche, Spain.

<sup>2</sup> Microbiology Section, University General Hospital of Alicante, Alicante Institute for Health and Biomedical Research (ISABIAL Foundation).

<sup>3</sup> Statistics and Operative Research Department, Miguel Hernández University (UMH), Avda. Universidad s/n, 03202, Elche, Spain.

<sup>4</sup> CIBER, Fisiopatología de la Obesidad y la Nutrición, CIBERobn, Instituto de Salud Carlos III (CB12/03/30038).

# These authors shared author co-seniorship.

\* Corresponding author: Enrique Barrajon-Catalán, Instituto de Biología Molecular y Celular (IBMC) and Instituto de Investigación, Desarrollo e Innovación en Biotecnología Sanitaria de Elche (IDiBE), Universidad Miguel Hernández; 03202, Elche, Spain.

Tel.: +0034 965222586

E-mail adress: [e.barrajon@umh.es](mailto:e.barrajon@umh.es) (E. Barrajon-Catalán)

## Supplementary Material

Families of polyphenols

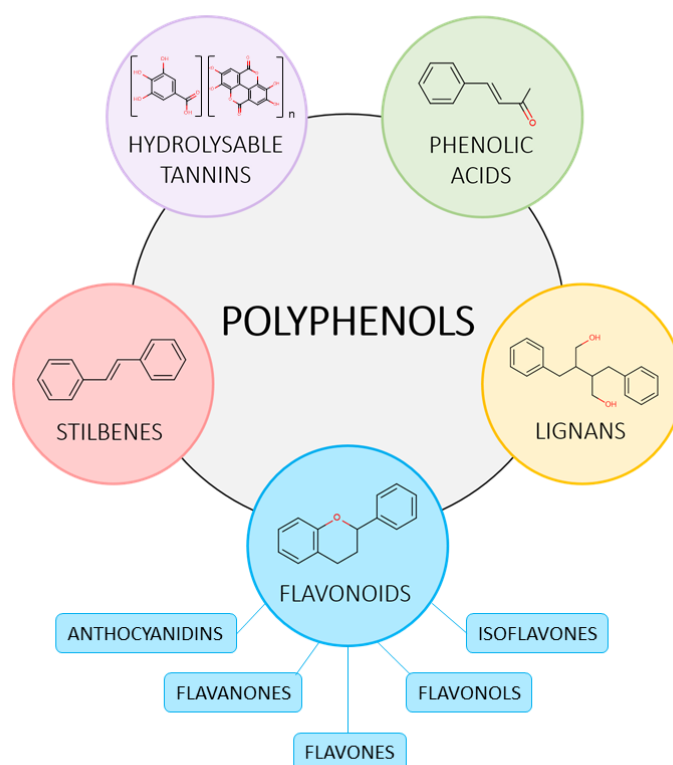

**Supplementary Figure S1.** Families of polyphenols with their core chemical structures.

Standard curves

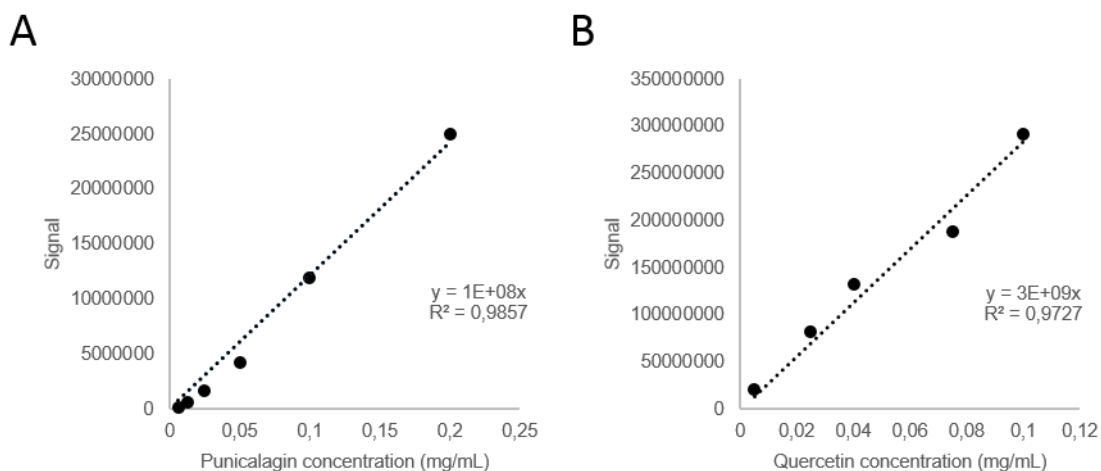

**Supplementary Figure S2.** Standard curves for punicalagin (A) and quercetin (B).

Main compounds in CS and GP extracts

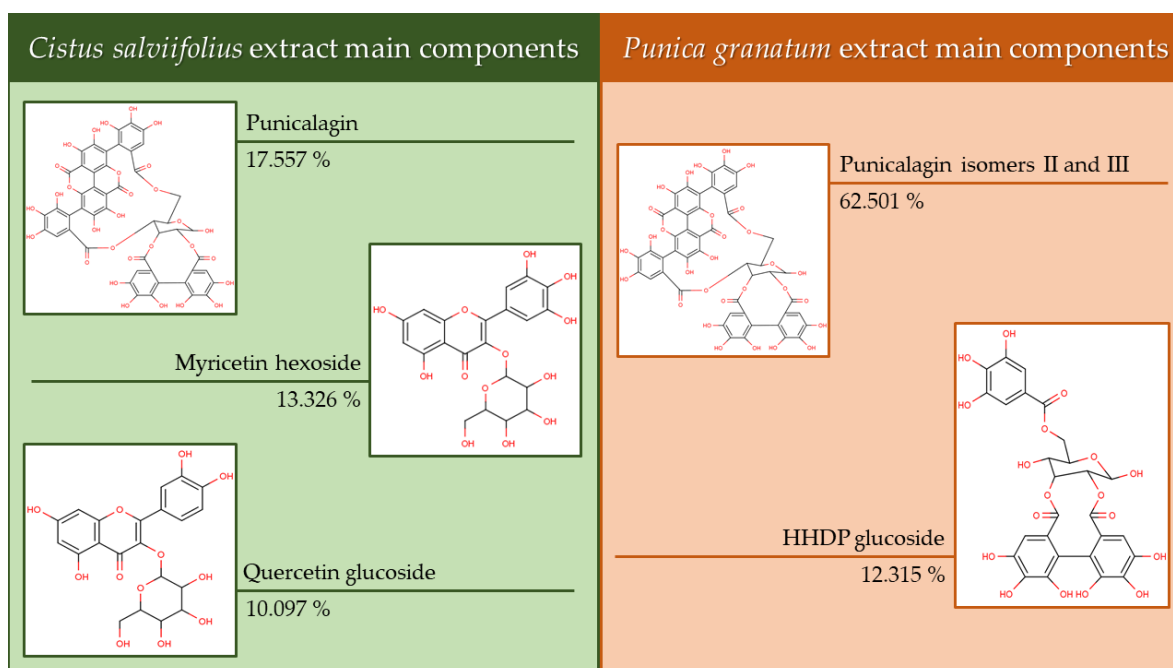

**Supplementary Figure S3.** Compounds with higher relative abundance identified on CS (green, left) and GP (orange, right) extracts.

Distribution of the MIC<sub>50</sub> values by extract and antibiotic resistance profile

**A**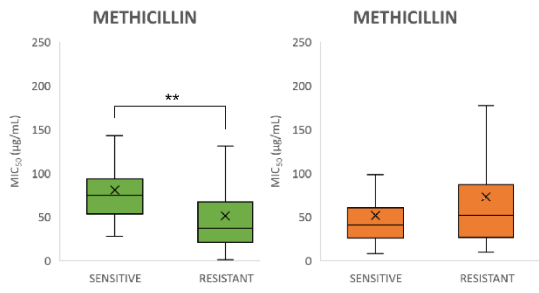**B**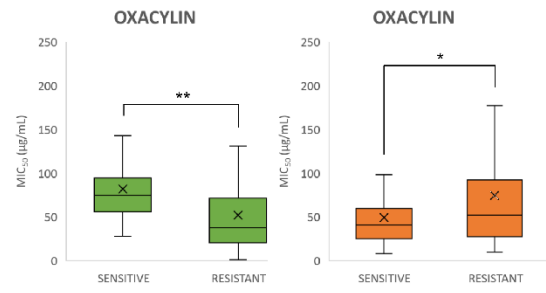**C**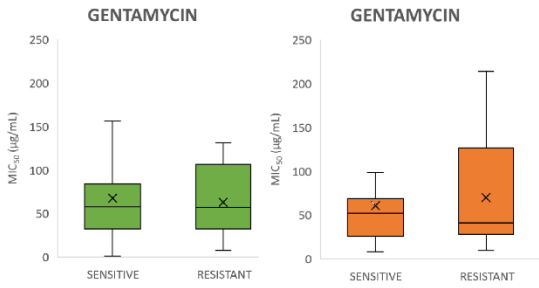**D**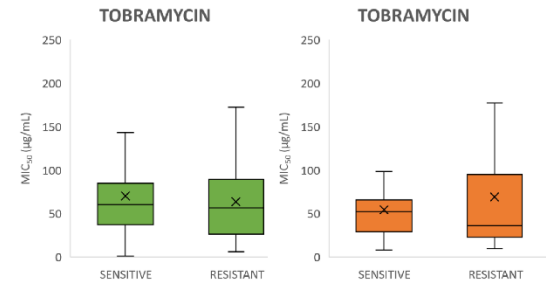**E**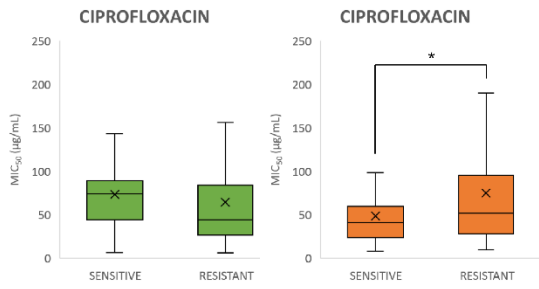**F**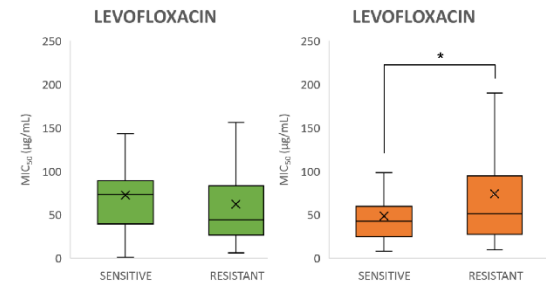**G**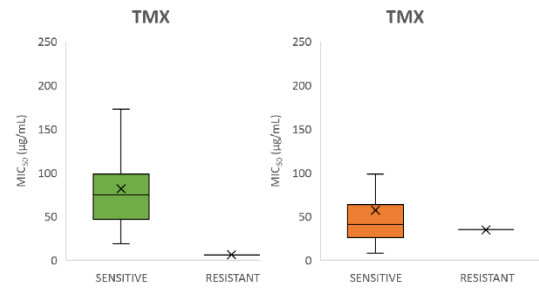**H**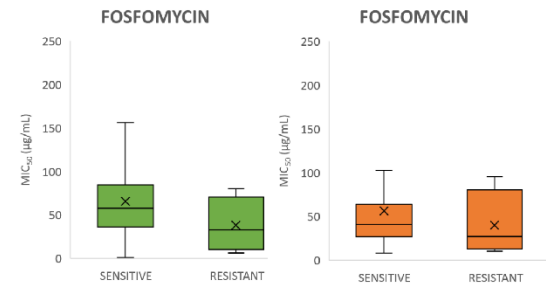

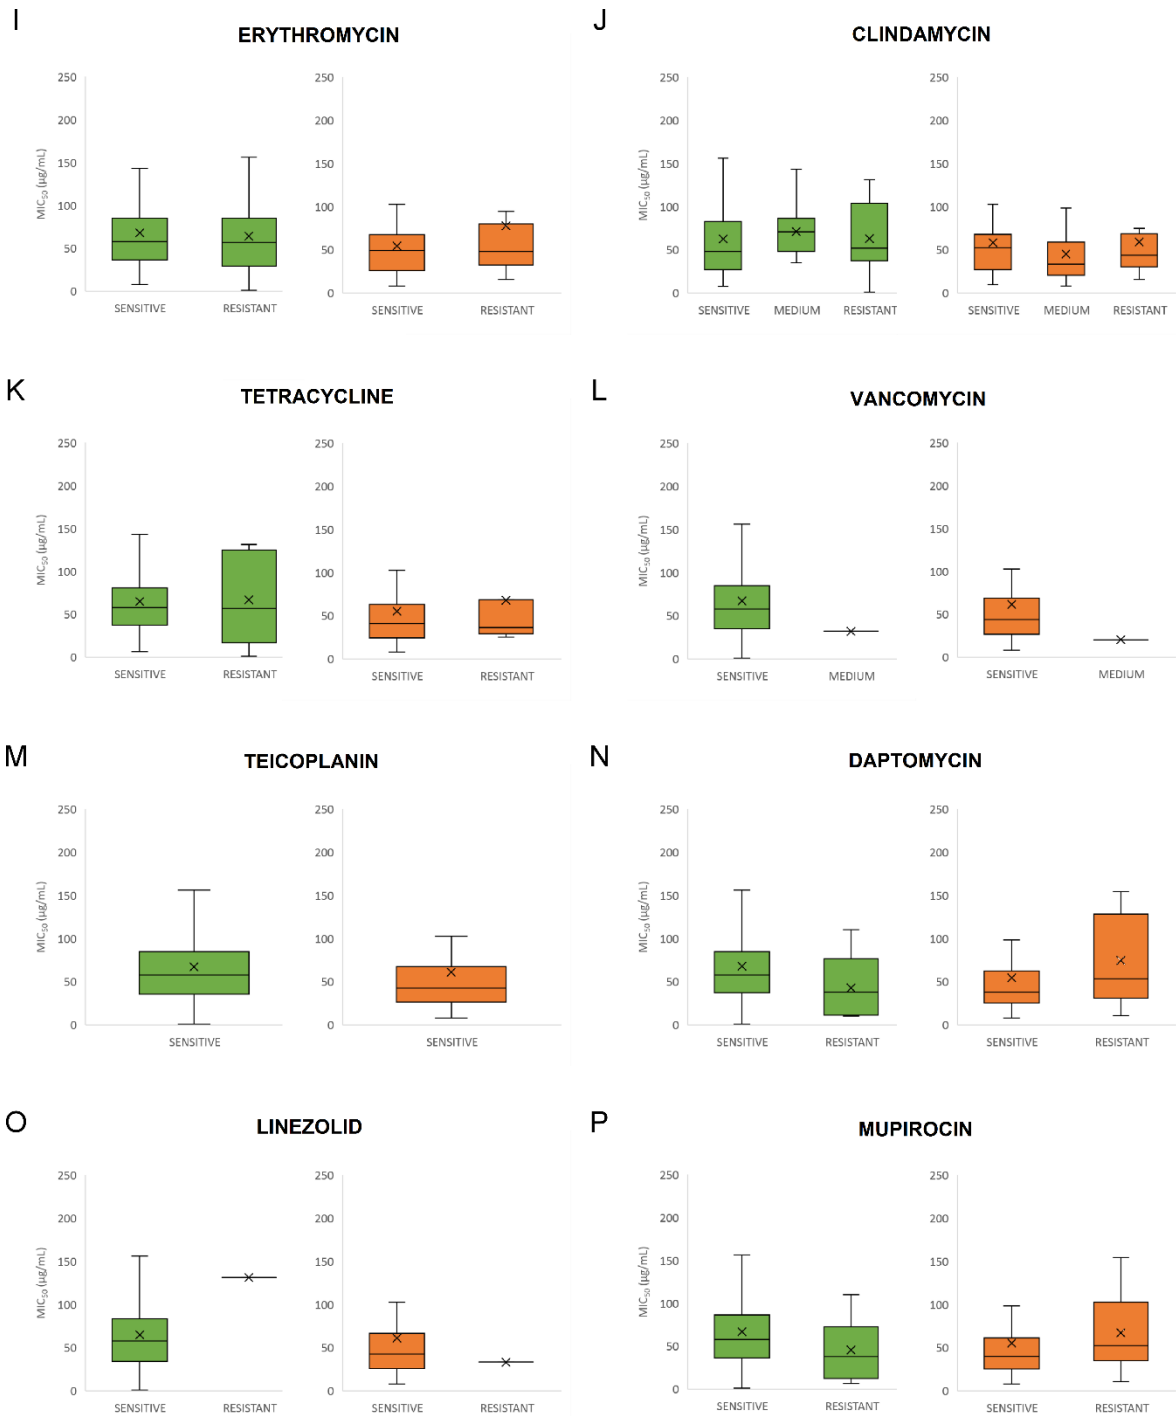

**Supplementary Figure S4.** Distribution of the MIC<sub>50</sub> values (µg/mL) of every *S. aureus* isolate grouped by single antibiotic resistances and extract used (green for CS and orange for GP).

MCA results

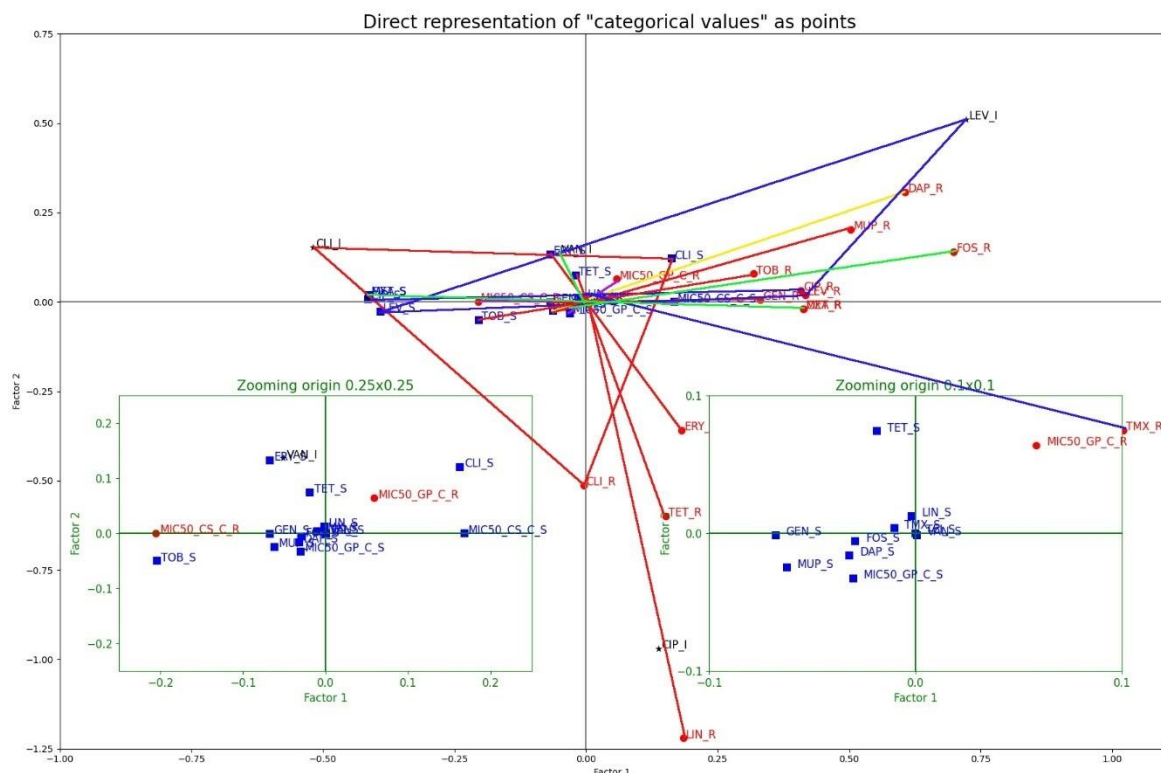

**Supplementary Figure S5.** MCA results for "categorical values" as points. Distribution of the different groups of isolates divided based on their resistance or sensitivity to the different clinical antibiotics and extracts tested. MET: methicillin, OXA: oxacillin, GEN: gentamicin, TOB: tobramycin, CIP: ciprofloxacin, LEV: levofloxacin, TMX: trimetrexate, FOS: fosfomicin, ERY: erythromycin, CLI: clindamycin, TET: tetracycline, VAN: vancomycin, TEI: teicoplanin, DAP: daptomycin, LIN: linezolid, MUP: mupirocin, CS: *Cistus salviifolius* extract, GP: *Punica granatum* extract. (R, red text and red circles), (I, black text and black \* symbols) and (S, blue text and blue squares) mean Resistant, Intermediate and Sensitive, respectively. Two zoomings inserts have been included to a better understanding. Points related to the same antibiotic are connected by a line whose color is related to the mechanism of action: red for protein synthesis inhibitors, blue for cell division inhibitors, yellow for plasmatic membrane disruptors, green for cell wall disruptors and black for others mechanisms.

#### MIC<sub>50</sub> of extracts against MRSA

| Species          | Isolate | CS MIC <sub>50</sub> | GP MIC <sub>50</sub> |
|------------------|---------|----------------------|----------------------|
| <i>S. aureus</i> | 1       | 38.585               | 61.165               |
| <i>S. aureus</i> | 2       | 21.115               | 68.210               |
| <i>S. aureus</i> | 3       | 30.450               | 26.380               |
| <i>S. aureus</i> | 4       | 28.174               | 44.460               |
| <i>S. aureus</i> | 5       | 32.005               | 20.121               |
| <i>S. aureus</i> | 6       | 38.115               | 74.680               |
| <i>S. aureus</i> | 7       | 20.425               | 58.950               |
| <i>S. aureus</i> | 8       | 16.640               | 25.045               |
| <i>S. aureus</i> | 9       | 26.735               | 82.410               |

|                  |    |         |         |
|------------------|----|---------|---------|
| <i>S. aureus</i> | 10 | 44.235  | 40.020  |
| <i>S. aureus</i> | 11 | 220.220 | 84.520  |
| <i>S. aureus</i> | 12 | 37.325  | 53.165  |
| <i>S. aureus</i> | 13 | 14.078  | 97.185  |
| <i>S. aureus</i> | 14 | 47.080  | 64.013  |
| <i>S. aureus</i> | 15 | 63.060  | 62.570  |
| <i>S. aureus</i> | 16 | 6.382   | 36.390  |
| <i>S. aureus</i> | 17 | 25.205  | 52.660  |
| <i>S. aureus</i> | 18 | 109.000 | 14.845  |
| <i>S. aureus</i> | 19 | 7.977   | 272.600 |
| <i>S. aureus</i> | 20 | 37.000  | 189.900 |
| <i>S. aureus</i> | 21 | 31.015  | 37.080  |
| <i>S. aureus</i> | 22 | 80.390  | 26.830  |
| <i>S. aureus</i> | 23 | 18.140  | 70.540  |
| <i>S. aureus</i> | 24 | 30.120  | 24.860  |
| <i>S. aureus</i> | 25 | 41.900  | 19.770  |
| <i>S. aureus</i> | 26 | 0.944   | 51.890  |
| <i>S. aureus</i> | 27 | 23.535  | 95.330  |
| <i>S. aureus</i> | 28 | 18.780  | 281.400 |
| <i>S. aureus</i> | 29 | 73.220  | 241.100 |
| <i>S. aureus</i> | 30 | 58.920  | 35.190  |
| <i>S. aureus</i> | 31 | 29.145  | 71.115  |
| <i>S. aureus</i> | 32 | 172.400 | 94.540  |
| <i>S. aureus</i> | 33 | 40.835  | 26.755  |
| <i>S. aureus</i> | 34 | 7.488   | 9.764   |
| <i>S. aureus</i> | 35 | 80.110  | 10.430  |
| <i>S. aureus</i> | 36 | 156.000 | 177.100 |
| <i>S. aureus</i> | 37 | 27.790  | 30.485  |
| <i>S. aureus</i> | 38 | 64.960  | 52.215  |
| <i>S. aureus</i> | 39 | 124.900 | 28.865  |
| <i>S. aureus</i> | 40 | 74.250  | 150.200 |
| <i>S. aureus</i> | 41 | 38.050  | 19.235  |
| <i>S. aureus</i> | 42 | 131.000 | 15.250  |
| <i>S. aureus</i> | 43 | 112.225 | 40.200  |
| <i>S. aureus</i> | 44 | 57.040  | 214.100 |
| <i>S. aureus</i> | 45 | 37.920  | 10.660  |

|                  |    |         |         |
|------------------|----|---------|---------|
| <i>S. aureus</i> | 46 | 110.105 | 154.185 |
| <i>S. aureus</i> | 47 | 12.400  | 102.675 |
| <i>S. aureus</i> | 48 | 26.800  | 37.730  |
| <i>S. aureus</i> | 49 | 10.052  | 51.175  |
| <i>S. aureus</i> | 50 | 6.162   | 34.665  |

**Supplementary Table S1.** MIC<sub>50</sub> (µg/mL) values of the CS and GP extracts against 50 MRSA clinical isolates.

MIC<sub>50</sub> of extracts against MSSA

| Species          | Isolate | CS MIC <sub>50</sub> | GP MIC <sub>50</sub> |
|------------------|---------|----------------------|----------------------|
| <i>S. aureus</i> | 51      | 89.560               | 54.760               |
| <i>S. aureus</i> | 52      | 83.920               | 66.710               |
| <i>S. aureus</i> | 53      | >252.300             | 71.290               |
| <i>S. aureus</i> | 54      | >252.300             | 54.340               |
| <i>S. aureus</i> | 55      | 252.300              | >174.800             |
| <i>S. aureus</i> | 56      | 96.930               | 31.240               |
| <i>S. aureus</i> | 57      | 92.260               | 66.500               |
| <i>S. aureus</i> | 58      | 105.500              | 21.810               |
| <i>S. aureus</i> | 59      | 57.520               | 30.810               |
| <i>S. aureus</i> | 60      | 27.780               | 25.180               |
| <i>S. aureus</i> | 61      | 74.710               | 60.710               |
| <i>S. aureus</i> | 62      | 74.510               | 52.490               |
| <i>S. aureus</i> | 63      | 31.000               | 157.500              |
| <i>S. aureus</i> | 64      | 70.720               | 8.152                |
| <i>S. aureus</i> | 65      | 88.090               | 57.090               |
| <i>S. aureus</i> | 66      | >252.300             | 98.470               |
| <i>S. aureus</i> | 67      | 78.460               | 59.510               |
| <i>S. aureus</i> | 68      | 39.050               | >174.800             |
| <i>S. aureus</i> | 69      | 142.900              | 20.280               |
| <i>S. aureus</i> | 70      | 56.540               | >174.800             |
| <i>S. aureus</i> | 71      | 57.490               | 40.970               |
| <i>S. aureus</i> | 72      | 105.300              | 34.130               |
| <i>S. aureus</i> | 73      | 34.950               | 32.220               |
| <i>S. aureus</i> | 74      | 74.920               | 28.390               |
| <i>S. aureus</i> | 75      | 214.200              | >174.800             |
| <i>S. aureus</i> | 76      | 72.320               | 22.740               |
| <i>S. aureus</i> | 77      | 55.050               | 20.510               |
| <i>S. aureus</i> | 78      | 41.180               | >174.800             |

|                  |     |          |          |
|------------------|-----|----------|----------|
| <i>S. aureus</i> | 79  | 78.530   | 14.380   |
| <i>S. aureus</i> | 80  | >252.300 | 18.360   |
| <i>S. aureus</i> | 81  | 78.500   | 48.970   |
| <i>S. aureus</i> | 82  | 73.900   | 43.800   |
| <i>S. aureus</i> | 83  | 57.740   | 34.400   |
| <i>S. aureus</i> | 84  | 76.330   | 30.110   |
| <i>S. aureus</i> | 85  | 74.050   | 23.510   |
| <i>S. aureus</i> | 86  | 37.140   | 56.990   |
| <i>S. aureus</i> | 87  | 79.130   | 133.700  |
| <i>S. aureus</i> | 88  | 123.500  | 19.280   |
| <i>S. aureus</i> | 89  | 46.690   | >174.800 |
| <i>S. aureus</i> | 90  | 113.500  | 174.800  |
| <i>S. aureus</i> | 91  | 57.760   | 163.400  |
| <i>S. aureus</i> | 92  | 102.900  | 23.570   |
| <i>S. aureus</i> | 93  | 49.280   | 54.790   |
| <i>S. aureus</i> | 94  | 37.760   | 68.700   |
| <i>S. aureus</i> | 95  | 43.040   | 53.590   |
| <i>S. aureus</i> | 96  | 128.700  | 27.590   |
| <i>S. aureus</i> | 97  | 83.200   | 33.160   |
| <i>S. aureus</i> | 98  | 37.170   | 40.880   |
| <i>S. aureus</i> | 99  | 84.960   | 60.490   |
| <i>S. aureus</i> | 100 | 131.200  | 33.130   |

**Supplementary Table S2.** MIC<sub>50</sub> (µg/mL) values of the CS and GP extracts against 50 MSSA clinical isolates.

*S. aureus* isolates antibiotic resistance profiles

| Isolate | MET | OXA | GEN | TOB | CIP | LEV | TMX | FOS | ERY | CLI | TET | VAN | TEI | DAP | LIN | MUP |
|---------|-----|-----|-----|-----|-----|-----|-----|-----|-----|-----|-----|-----|-----|-----|-----|-----|
| 1       | R   | R   | S   | S   | S   | S   | S   | S   | S   | S   | S   | S   | S   | S   | S   | S   |
| 2       | R   | R   | S   | S   | S   | S   | S   | S   | S   | S   | S   | S   | S   | S   | S   | S   |
| 3       | R   | R   | S   | S   | S   | S   | S   | S   | S   | S   | S   | S   | S   | S   | S   | S   |
| 4       | R   | R   | S   | S   | S   | S   | S   | S   | S   | S   | S   | S   | S   | S   | S   | S   |
| 5       | R   | R   | S   | S   | S   | S   | S   | S   | S   | S   | S   | I   | S   | S   | S   | S   |
| 6       | R   | R   | S   | S   | S   | S   | S   | S   | R   | R   | S   | S   | S   | S   | S   | S   |
| 7       | R   | R   | S   | S   | R   | R   | S   | S   | S   | S   | S   | S   | S   | S   | S   | S   |
| 8       | R   | R   | S   | S   | I   | S   | S   | S   | S   | S   | R   | S   | S   | S   | S   | S   |
| 9       | R   | R   | S   | S   | R   | R   | S   | S   | S   | S   | S   | S   | S   | S   | S   | S   |
| 10      | R   | R   | S   | S   | R   | R   | S   | S   | S   | S   | S   | S   | S   | S   | S   | S   |
| 11      | R   | R   | S   | S   | R   | R   | S   | S   | S   | S   | S   | S   | S   | S   | S   | S   |



|    |   |   |   |   |   |   |   |   |   |   |   |   |   |   |   |   |
|----|---|---|---|---|---|---|---|---|---|---|---|---|---|---|---|---|
| 12 | R | R | S | S | R | R | S | S | S | S | S | S | S | S | S | S |
| 13 | R | R | S | S | R | R | S | S | S | S | S | S | S | S | S | S |
| 14 | R | R | S | S | R | R | S | S | S | S | S | S | S | S | S | S |
| 15 | R | R | S | S | R | R | S | S | R | S | S | S | S | S | S | S |
| 16 | R | R | S | S | S | S | S | S | R | R | R | S | S | S | S | S |
| 17 | R | R | S | R | R | R | S | S | S | S | S | S | S | S | S | S |
| 18 | R | R | S | R | R | R | S | S | S | S | S | S | S | S | S | S |
| 19 | R | R | S | R | R | R | S | S | S | S | S | S | S | S | S | S |
| 20 | R | R | S | S | R | R | S | S | S | S | R | S | S | S | S | S |
| 21 | R | R | S | R | R | R | S | S | S | S | S | S | S | S | S | S |
| 22 | R | R | S | R | R | R | S | S | S | S | S | S | S | S | S | S |
| 23 | R | R | S | R | R | R | S | S | S | S | S | S | S | S | S | S |
| 24 | R | R | S | S | R | R | S | S | R | S | S | S | S | S | S | S |
| 25 | R | R | S | S | R | R | S | R | S | S | S | S | S | S | S | S |
| 26 | R | R | S | S | I | S | S | S | R | R | R | S | S | S | S | S |
| 27 | R | R | S | R | R | I | S | R | S | S | S | S | S | S | S | S |
| 28 | R | R | S | R | R | R | S | S | R | S | S | S | S | S | S | S |
| 29 | R | R | S | R | R | R | S | S | R | S | S | S | S | S | S | S |
| 30 | R | R | S | R | R | R | S | S | R | S | S | S | S | S | S | S |
| 31 | R | R | S | S | R | R | S | S | R | R | S | S | S | S | S | S |
| 32 | R | R | S | R | R | R | S | S | R | S | S | S | S | S | S | S |
| 33 | R | R | R | R | R | R | S | S | S | S | S | S | S | S | S | S |
| 34 | R | R | R | R | R | R | S | S | S | S | S | S | S | S | S | S |
| 35 | R | R | S | R | R | R | S | R | S | S | S | S | S | S | S | S |
| 36 | R | R | S | R | R | R | S | S | R | S | S | S | S | S | S | S |
| 37 | R | R | S | R | R | R | S | S | R | S | S | S | S | S | S | S |
| 38 | R | R | S | R | R | R | S | S | S | S | S | S | S | S | S | R |
| 39 | R | R | R | R | S | S | S | S | S | R | R | S | S | S | S | S |
| 40 | R | R | R | R | R | R | S | S | S | S | S | S | S | S | S | R |
| 41 | R | R | S | R | R | R | S | S | R | R | S | S | S | S | S | S |
| 42 | R | R | S | R | R | R | S | S | R | R | S | S | S | S | S | S |
| 43 | R | R | R | S | R | R | S | S | R | R | R | S | S | S | S | S |
| 44 | R | R | R | S | R | R | S | S | R | R | R | S | S | S | S | S |
| 45 | R | R | R | R | R | R | S | S | S | S | S | S | S | R | S | R |
| 46 | R | R | R | R | R | R | S | S | S | S | S | S | S | R | S | R |
| 47 | R | R | R | R | R | R | S | S | S | S | S | S | S | R | S | R |

|    |   |   |   |   |   |   |   |   |   |   |   |   |   |   |   |   |
|----|---|---|---|---|---|---|---|---|---|---|---|---|---|---|---|---|
| 48 | R | R | R | R | R | R | S | S | R | S | S | S | S | S | S | R |
| 49 | R | R | R | R | R | R | S | S | S | S | S | S | S | R | S | R |
| 50 | R | R | S | R | R | R | R | R | R | R | S | S | S | S | S | R |
| 51 | S | S | S | S | S | S | S | S | S | S | S | S | S | S | S | S |
| 52 | S | S | S | S | S | S | S | S | S | S | S | S | S | S | S | S |
| 53 | S | S | S | S | S | S | S | S | S | S | S | S | S | S | S | S |
| 54 | S | S | S | S | S | S | S | S | S | S | S | S | S | S | S | S |
| 55 | S | S | S | S | S | S | S | S | S | S | S | S | S | S | S | S |
| 56 | S | S | S | S | S | S | S | S | S | S | S | S | S | S | S | S |
| 57 | S | S | S | S | S | S | S | S | S | S | S | S | S | S | S | S |
| 58 | S | S | S | S | S | S | S | S | S | S | S | S | S | S | S | S |
| 59 | S | S | S | S | S | S | S | S | S | S | S | S | S | S | S | S |
| 60 | S | S | S | S | S | S | S | S | S | S | S | S | S | S | S | S |
| 61 | S | S | S | S | S | S | S | S | S | S | S | S | S | S | S | S |
| 62 | S | S | S | S | S | S | S | S | S | S | S | S | S | S | S | S |
| 63 | S | S | S | S | S | S | S | S | S | S | S | S | S | S | S | S |
| 64 | S | S | S | S | S | S | S | S | S | I | S | S | S | S | S | S |
| 65 | S | S | S | S | S | S | S | S | S | I | S | S | S | S | S | S |
| 66 | S | S | S | S | S | S | S | S | S | I | S | S | S | S | S | S |
| 67 | S | S | S | S | S | S | S | S | S | I | S | S | S | S | S | S |
| 68 | S | S | S | S | S | S | S | S | S | I | S | S | S | S | S | S |
| 69 | S | S | S | S | S | S | S | S | S | I | S | S | S | S | S | S |
| 70 | S | S | S | S | S | S | S | S | S | I | S | S | S | S | S | S |
| 71 | S | S | S | S | S | S | S | S | S | I | S | S | S | S | S | S |
| 72 | S | S | S | S | S | S | S | S | S | I | S | S | S | S | S | S |
| 73 | S | S | S | S | S | S | S | S | S | I | S | S | S | S | S | S |
| 74 | S | S | S | S | S | S | S | S | S | I | S | S | S | S | S | S |
| 75 | S | S | S | S | R | S | S | S | S | S | S | S | S | S | S | S |
| 76 | S | S | S | S | S | S | S | S | S | S | S | S | S | S | S | R |
| 77 | S | S | S | R | S | S | S | S | S | I | S | S | S | S | S | S |
| 78 | S | S | S | R | S | S | S | S | S | I | S | S | S | S | S | S |
| 79 | S | S | S | R | S | S | S | S | S | I | S | S | S | S | S | S |
| 80 | S | S | S | R | S | S | S | S | S | I | S | S | S | S | S | S |
| 81 | S | S | R | S | S | S | S | S | S | R | S | S | S | S | S | S |
| 82 | S | S | S | S | S | S | S | S | R | R | S | S | S | S | S | S |
| 83 | S | S | S | S | R | R | S | S | S | S | S | S | S | S | S | S |

|     |   |   |   |   |   |   |   |   |   |   |   |   |   |   |   |   |
|-----|---|---|---|---|---|---|---|---|---|---|---|---|---|---|---|---|
| 84  | S | S | S | S | S | S | S | S | R | R | S | S | S | S | S | S |
| 85  | S | S | S | S | S | S | S | S | R | R | S | S | S | S | S | S |
| 86  | S | S | S | S | S | S | S | S | R | R | S | S | S | S | S | S |
| 87  | S | S | S | S | R | R | S | S | S | S | S | S | S | S | S | S |
| 88  | S | S | S | S | R | R | S | S | S | S | S | S | S | S | S | S |
| 89  | S | S | S | S | S | S | S | S | R | R | S | S | S | S | S | S |
| 90  | S | S | S | S | S | S | S | S | R | R | S | S | S | S | S | S |
| 91  | S | S | R | R | S | S | S | S | S | I | S | S | S | S | S | S |
| 92  | S | S | R | R | S | S | S | S | S | I | S | S | S | S | S | S |
| 93  | S | S | R | R | S | S | S | S | S | S | S | S | S | S | S | R |
| 94  | S | S | S | S | S | S | S | S | S | R | R | S | S | S | S | R |
| 95  | S | S | S | S | S | S | S | S | R | R | S | S | S | R | S | S |
| 96  | S | S | S | R | R | R | S | S | S | S | R | S | S | S | S | S |
| 97  | S | S | S | R | R | R | S | S | S | S | R | S | S | S | S | S |
| 98  | S | S | R | R | R | R | S | S | S | I | S | S | S | S | S | S |
| 99  | S | S | S | R | R | R | S | S | R | I | S | S | S | S | S | S |
| 100 | S | S | R | R | R | R | S | S | R | R | R | S | S | S | R | S |

**Supplementary Table S3.** Antibiotic resistance profiles of each *S. aureus* isolate tested. Isolates numbered from 1 to 50 are MRSA strains and isolates numbered from 51 to 100 are MSSA strains. S stands for sensitive to that antibiotic (green), R for resistant (red) and I for intermediate (yellow). MET: methicillin, OXA: oxacillin, GEN: gentamicin, TOB: tobramycin, CIP: ciprofloxacin, LEV: levofloxacin, TMX: trimetrexate, FOS: fosfomycin, ERY: erythromycin, CLI: clindamycin, TET: tetracycline, VAN: vancomycin, TEI: teicoplanin, DAP: daptomycin, LIN: linezolid, MUP: mupirocin.

GLMR results for CS

|           | coef     | std err | z      | p       | [0.025   | 0.975]  |
|-----------|----------|---------|--------|---------|----------|---------|
| Intercept | 40.081   | 5.261   | 7.618  | 0.000   | 29.769   | 50.393  |
| MET (R)   | -17.244  | 7.044   | -2.448 | 0.014*  | -31.051  | -3.437  |
| OXA (R)   | -17.244  | 7.044   | -2.448 | 0.014*  | -31.051  | -3.437  |
| GEN (R)   | 2.285    | 16.165  | 0.141  | 0.888   | -29.397  | 33.967  |
| TOB (R)   | 8.241    | 12.613  | 0.653  | 0.514   | -16.481  | 32.962  |
| CIP (I)   | -48.101  | 38.211  | -1.259 | 0.208   | -122.993 | 26.790  |
| CIP (R)   | 134.039  | 45.851  | 2.923  | 0.003** | 44.173   | 223.904 |
| LEV (I)   | -169.349 | 72.919  | -2.322 | 0.020*  | -312.267 | -26.431 |
| LEV (R)   | -127.759 | 47.217  | -2.706 | 0.007** | -220.302 | -35.215 |
| TMX (R)   | -39.575  | 60.793  | -0.651 | 0.515   | -158.727 | 79.578  |
| FOS (R)   | 4.931    | 33.082  | 0.149  | 0.882   | -59.909  | 69.770  |
| ERY (R)   | 7.495    | 15.722  | 0.477  | 0.634   | -23.318  | 38.309  |
| CLI (I)   | -14.198  | 15.599  | -0.910 | 0.363   | -44.771  | 16.375  |

|         |         |        |        |          |          |         |
|---------|---------|--------|--------|----------|----------|---------|
| CLI (R) | -10.825 | 19.693 | -0.550 | 0.583    | -49.422  | 27.773  |
| TET (R) | 12.884  | 18.845 | 0.684  | 0.494    | -24.052  | 49.819  |
| VAN (I) | -13.669 | 46.866 | -0.292 | 0.771    | -105.525 | 78.187  |
| TEI (S) | 40.081  | 5.261  | 7.618  | 0.000*** | 29.769   | 50.393  |
| DAP (R) | -9.800  | 25.153 | -0.390 | 0.697    | -59.099  | 39.500  |
| LIN (R) | 24.678  | 50.909 | 0.485  | 0.628    | -75.103  | 124.458 |
| MUP (R) | -16.059 | 19.772 | -0.812 | 0.417    | -54.812  | 22.693  |

**Supplementary Table S4.** GLMR results for MIC<sub>50</sub> values of the CS extract against all *S. aureus* isolates. MET: methicillin, OXA: oxacillin, GEN: gentamicin, TOB: tobramycin, CIP: ciprofloxacin, LEV: levofloxacin, TMX: trimetrexate, FOS: fosfomycin, ERY: erythromycin, CLI: clindamycin, TET: tetracycline, VAN: vancomycin, TEI: teicoplanin, DAP: daptomycin, LIN: linezolid, MUP: mupirocin. (R), (I) and (S) indicate resistant, intermediate and sensitive, respectively. Gray shaded rows indicate significant values ( $p < 0.05$ , \*;  $p < 0.01$ , \*\*;  $p < 0.001$ , \*\*\*).

GLMR results for GP

|           | coef    | std err | z      | p        | [0.025   | 0.975]  |
|-----------|---------|---------|--------|----------|----------|---------|
| Intercept | 27.835  | 6.668   | 4.174  | 0.000    | 14.765   | 40.904  |
| MET (R)   | 4.541   | 9.157   | 0.496  | 0.620    | -13.407  | 22.489  |
| OXA (R)   | 4.541   | 9.157   | 0.496  | 0.620    | -13.407  | 22.489  |
| GEN (R)   | 12.682  | 20.970  | 0.605  | 0.545    | -28.418  | 53.781  |
| TOB (R)   | -6.177  | 16.418  | -0.376 | 0.707    | -38.355  | 26.002  |
| CIP (I)   | -48.769 | 49.565  | -0.984 | 0.325    | -145.914 | 48.376  |
| CIP (R)   | 31.607  | 27.539  | 1.148  | 0.251    | -22.369  | 85.583  |
| LEV (I)   | 57.463  | 48.239  | 1.191  | 0.234    | -37.084  | 152.009 |
| LEV (R)   | -25.856 | 24.456  | -1.057 | 0.290    | -73.788  | 22.077  |
| TMX (R)   | 27.004  | 78.893  | 0.342  | 0.732    | -127.623 | 181.632 |
| FOS (R)   | -52.315 | 42.908  | -1.219 | 0.223    | -136.414 | 31.783  |
| ERY (R)   | 37.831  | 20.421  | 1.853  | 0.064    | -2.193   | 77.855  |
| CLI (I)   | -13.378 | 20.463  | -0.654 | 0.513    | -53.485  | 26.728  |
| CLI (R)   | -38.594 | 25.609  | -1.507 | 0.132    | -88.786  | 11.598  |
| TET (R)   | 22.866  | 24.542  | 0.932  | 0.351    | -25.235  | 70.967  |
| VAN (I)   | -44.631 | 60.765  | -0.734 | 0.463    | -163.729 | 74.466  |
| TEI (S)   | 27.835  | 6.668   | 4.174  | 0.000*** | 14.765   | 40.904  |
| DAP (R)   | 4.739   | 32.627  | 0.145  | 0.885    | -59.208  | 68.687  |
| LIN (R)   | -56.900 | 66.111  | -0.861 | 0.389    | -186.474 | 72.675  |
| MUP (R)   | -3.588  | 25.625  | -0.140 | 0.889    | -53.813  | 46.636  |

**Supplementary Table S5.** GLMR results for MIC<sub>50</sub> values of the GP extract against all *S. aureus* isolates. MET: methicillin, OXA: oxacillin, GEN: gentamicin, TOB: tobramycin, CIP: ciprofloxacin, LEV: levofloxacin, TMX: trimetrexate, FOS: fosfomycin, ERY: erythromycin, CLI: clindamycin, TET: tetracycline, VAN: vancomycin, TEI: teicoplanin, DAP: daptomycin, LIN: linezolid, MUP: mupirocin. (R), (I) and (S) indicate resistant, intermediate and sensitive, respectively. Gray shaded rows indicate significant values ( $p < 0.001$ , \*\*\*).
